# Supplementary material for: Dynamic Changes in miRNA Expression during the Generation of Expanded and Activated NK Cells
Source: MDPI journal article supplement (doi:10.3390/ijms241713556), 2023-08-31
Supplement: s1 [file s1]

## Supplementary Material

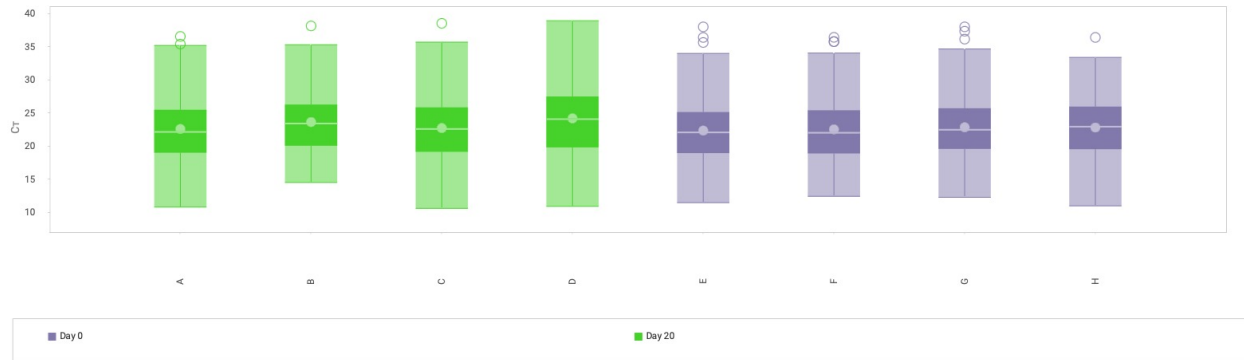

**Supplementary Figure S1.** CT values for each sample during RT-PCR. All CT values above 35 were not used when calculating  $\Delta\Delta CT$ s as they represent miRNAs with expressions too low to be detected through RT-qPCR. Green bars indicate the 4 day 20 samples and purple bars indicate the 4 day 0 samples. Pairs are as follow: A-E, B-F, C-G, D-H (day 20 - day 0).

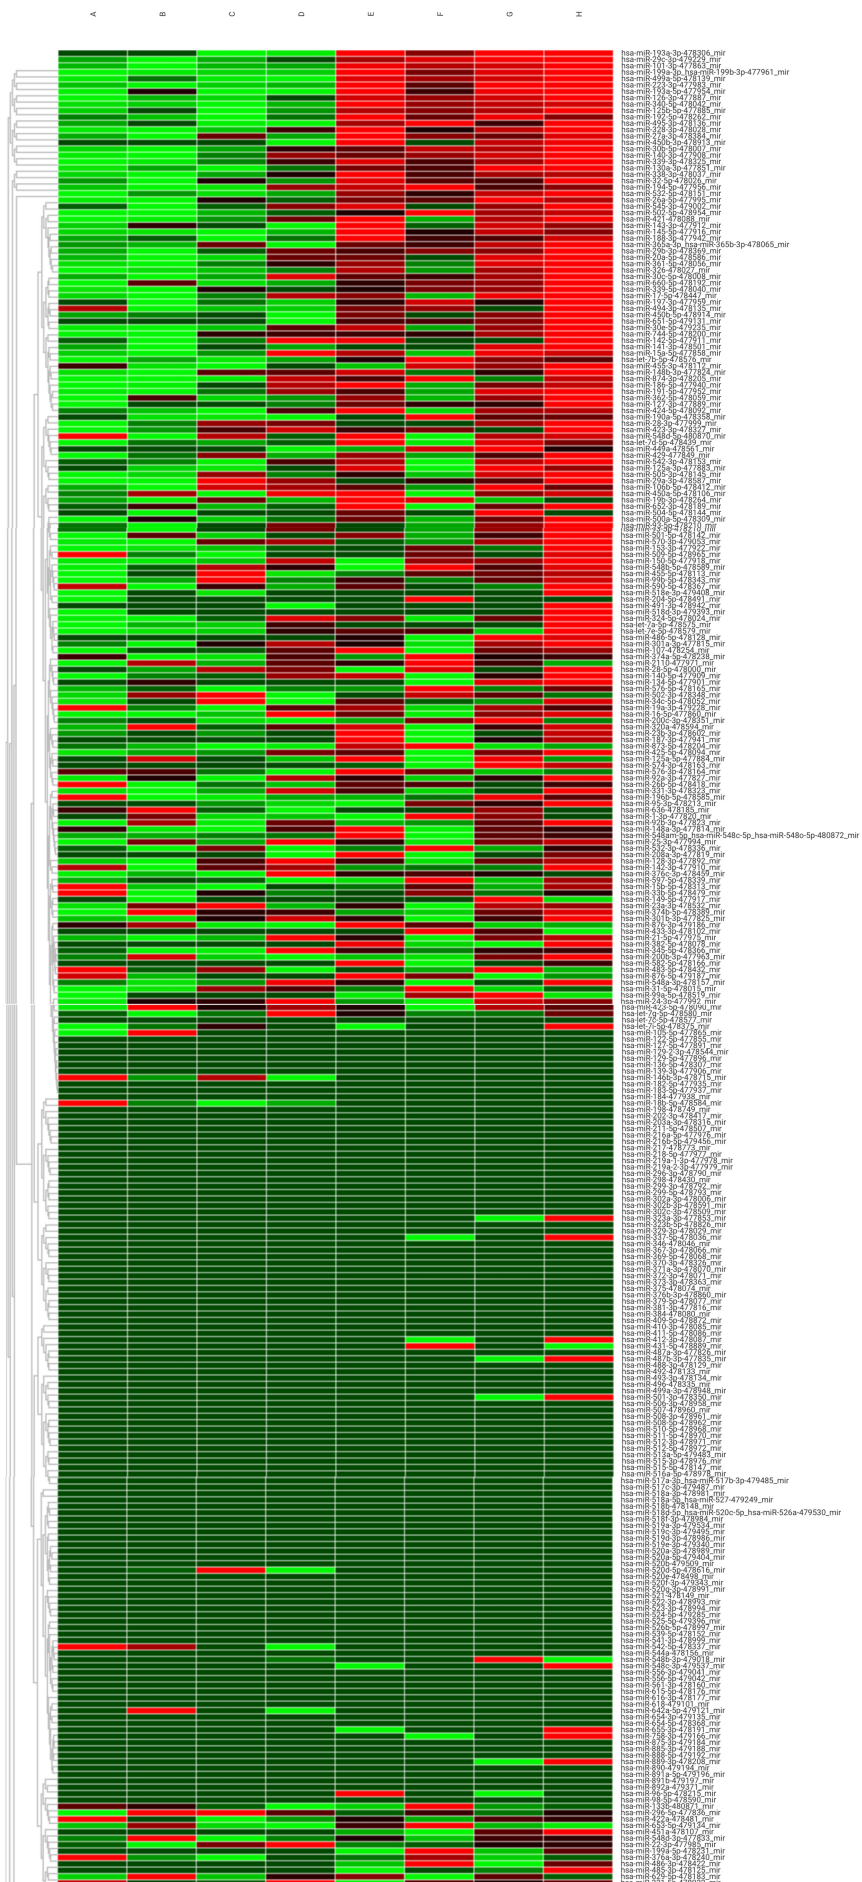

**Supplementary Figure S2.** Heatmaps of the 378 miRNA targets analyzed. Columns represent each sample. A- D are day 20 samples. E-H are day 0 samples. Each row represents a single miRNA target. Red represents an increase in expression and green represents diminishing expression.
